# Supplementary material for: Phylogeographical Analyses of a Relict Fern of Palaeotropical Flora (Vandenboschia speciosa): Distribution and Diversity Model in Relation to the Geological and Climate Events of the Late Miocene and Early Pliocene
Source: MDPI journal article supplement (doi:10.3390/plants11070839), 2022-03-22
Supplement: s1 [file s1]

## SUPPLEMENTARY MATERIALS

### **Phylogeographical analyses of a relict fern of palaeotropical flora (*Vandenboschia speciosa*): distribution and diversity model in relation to the geological and climate events of the Late Miocene and Early Pliocene**

Samira Ben-Menni Schuler, Hammadi Hamza, Gabriel Blanca, Ana Teresa Romero-García and Víctor N. Suárez-Santiago

The following Supporting information is available for this article:

**Figure S1.** Maximum likelihood tree for the *gapCp* sequences of *Vandenboschia speciosa* determined with PhyML.

**Figure S2.** Statistical parsimony networks of the *gapCp* sequences.

**Figure S3.** ptDNA haplotype phylogeny derived from the Bayesian inference with MrBAYES.

**Figure S4.** Results of species distribution modelling for the sporophyte and gametophyte phases of the life cycle of *Vandenboschia speciosa* using the maximum entropy algorithm and the Community Climate System Model (CCSM), as implemented in MaxEnt.

**Table S1.** Sampling details of *Vandenboschia speciosa* populations and outgroup species used in the present study.

**Table S2.** Percentage contribution and permutation importance of selected model for the species distribution modelling (SDM).

**Table S3.** Neutrality tests Fu's *F* and Tajima's *D* at the regional and supra-regional groupings.

**Figure S1.** Maximum likelihood tree for the 426 *gapCp* sequences of *Vandenboschia speciosa* and 15 of outgroups determined with PhyML; numbers above branches are support values from the Shimodaira-Hasegawa-Like implementation of the approximate likelihood-ratio test; the colours differentiate the two identified homoeolog copies; on the right are the names of the *V. speciosa* homoeologs, the names of the outgroup species, and the names of the sequences of Ebihara et al. (2005).

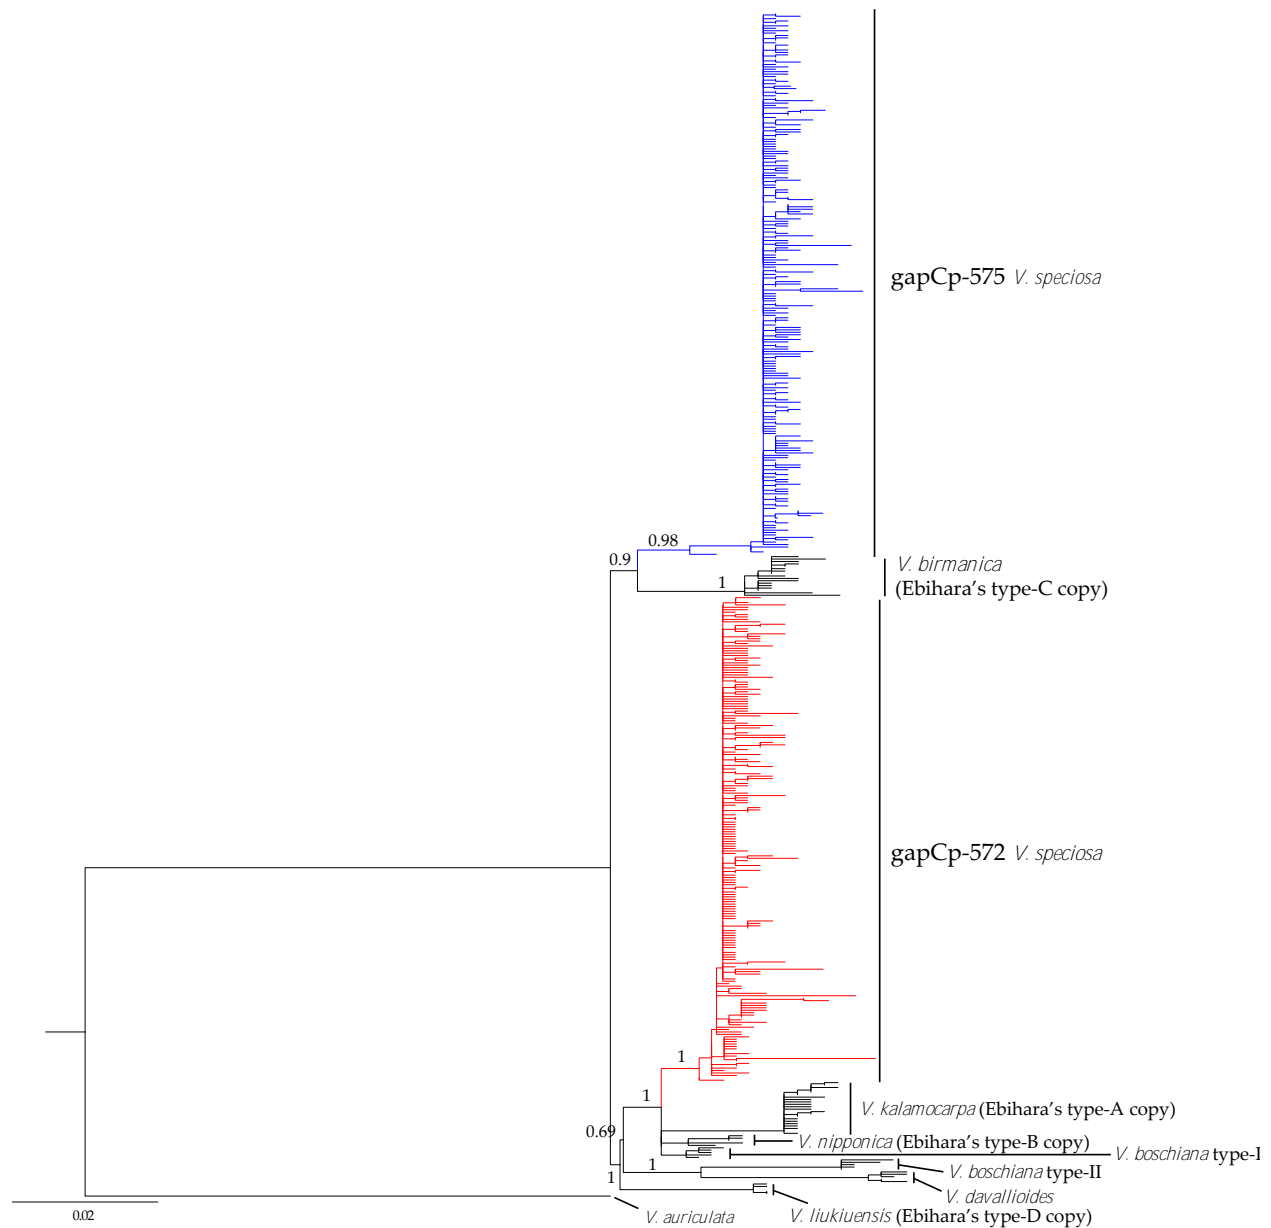

**Figure S2.** Statistical parsimony networks of the *gapCp* sequences. Networks for the gapCp-572 (upper) and gapCp-575 (lower) copies are shown; the haplotypes are denoted with Roman

numerals; numbers above branches represent the positions of the nucleotide substitution in the aligned sequences; circle sizes are proportional to the number of sequences found for each haplotype.

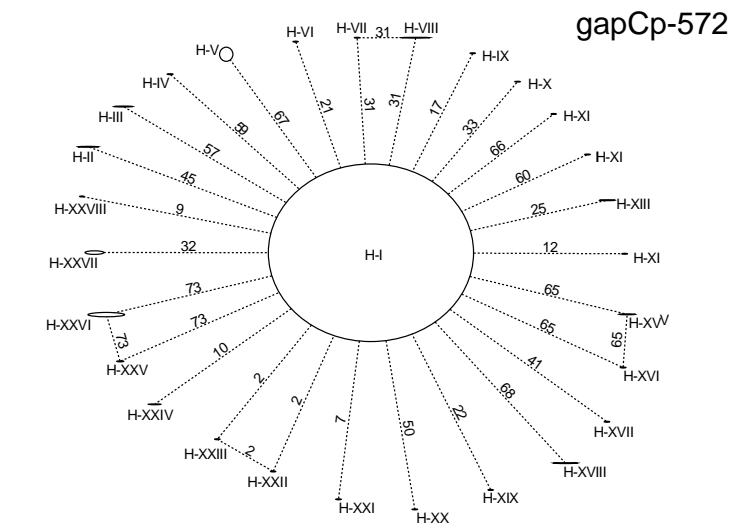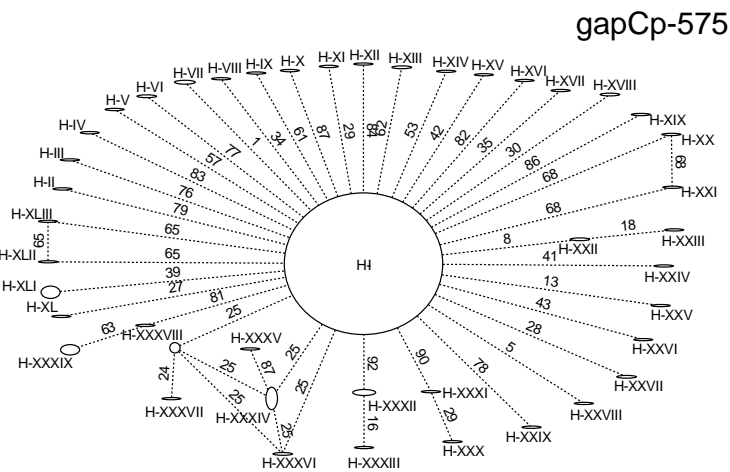

**Figure S3.** ptDNA haplotype phylogeny derived from the Bayesian inference with MrBAYES. The tree is 50% majority-rule consensus tree of the sample of trees after discarding 25% as burn-in; haplotypes are denoted with Roman numerals; numbers above branches are Bayesian posterior probabilities; for outgroup species, accession numbers of sequences taken from GenBank are shown before the species name.

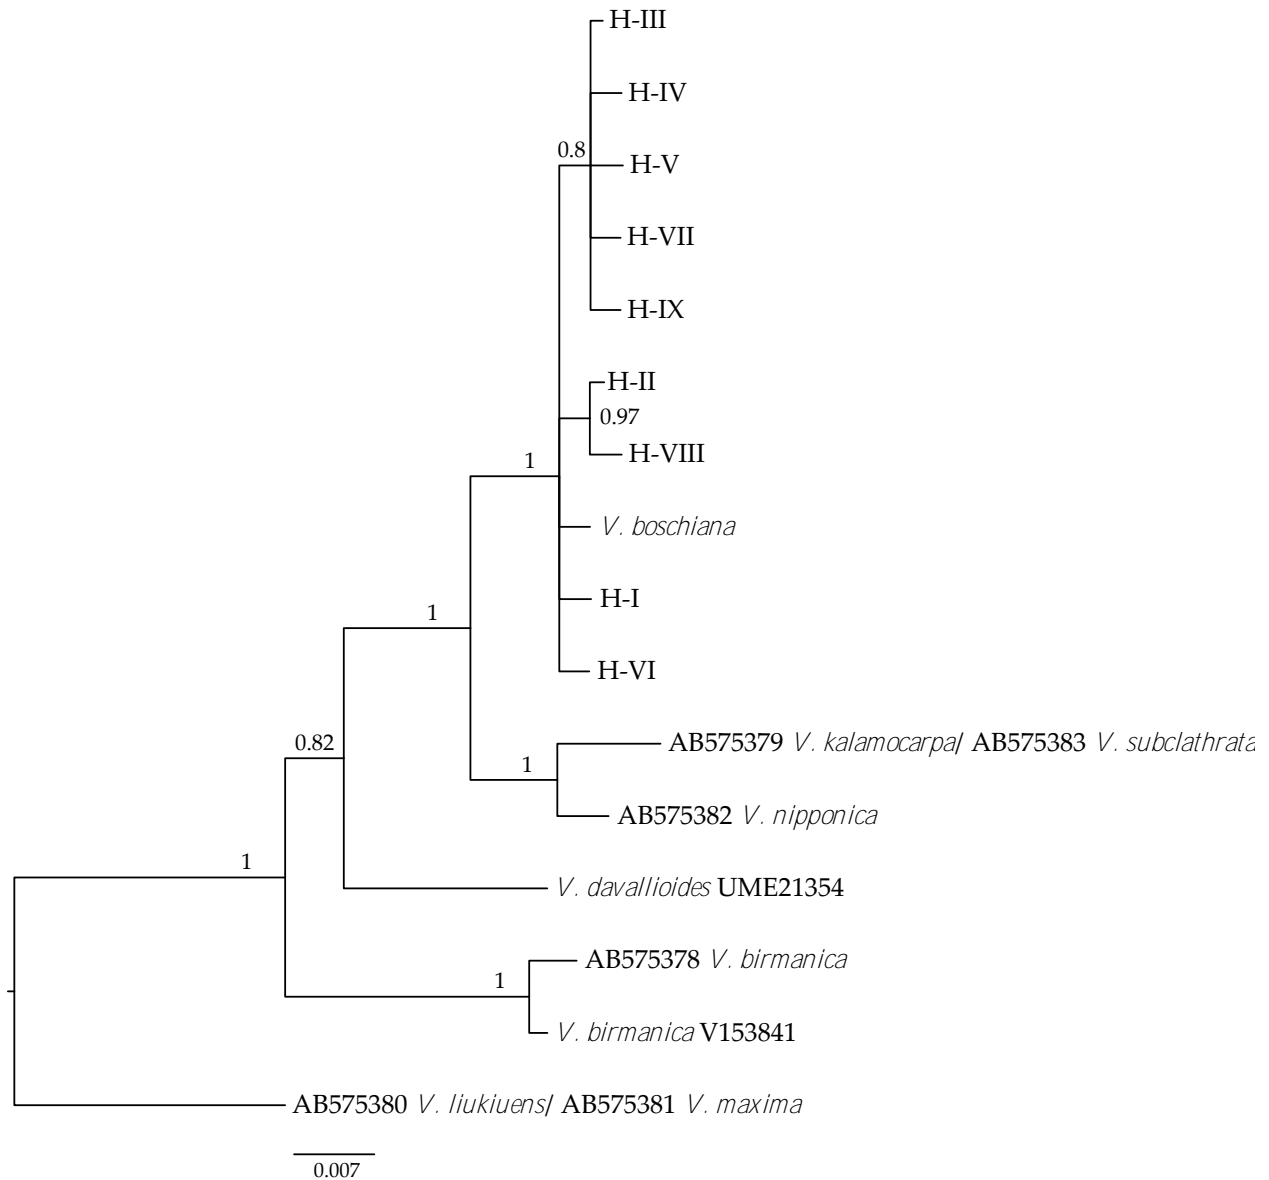

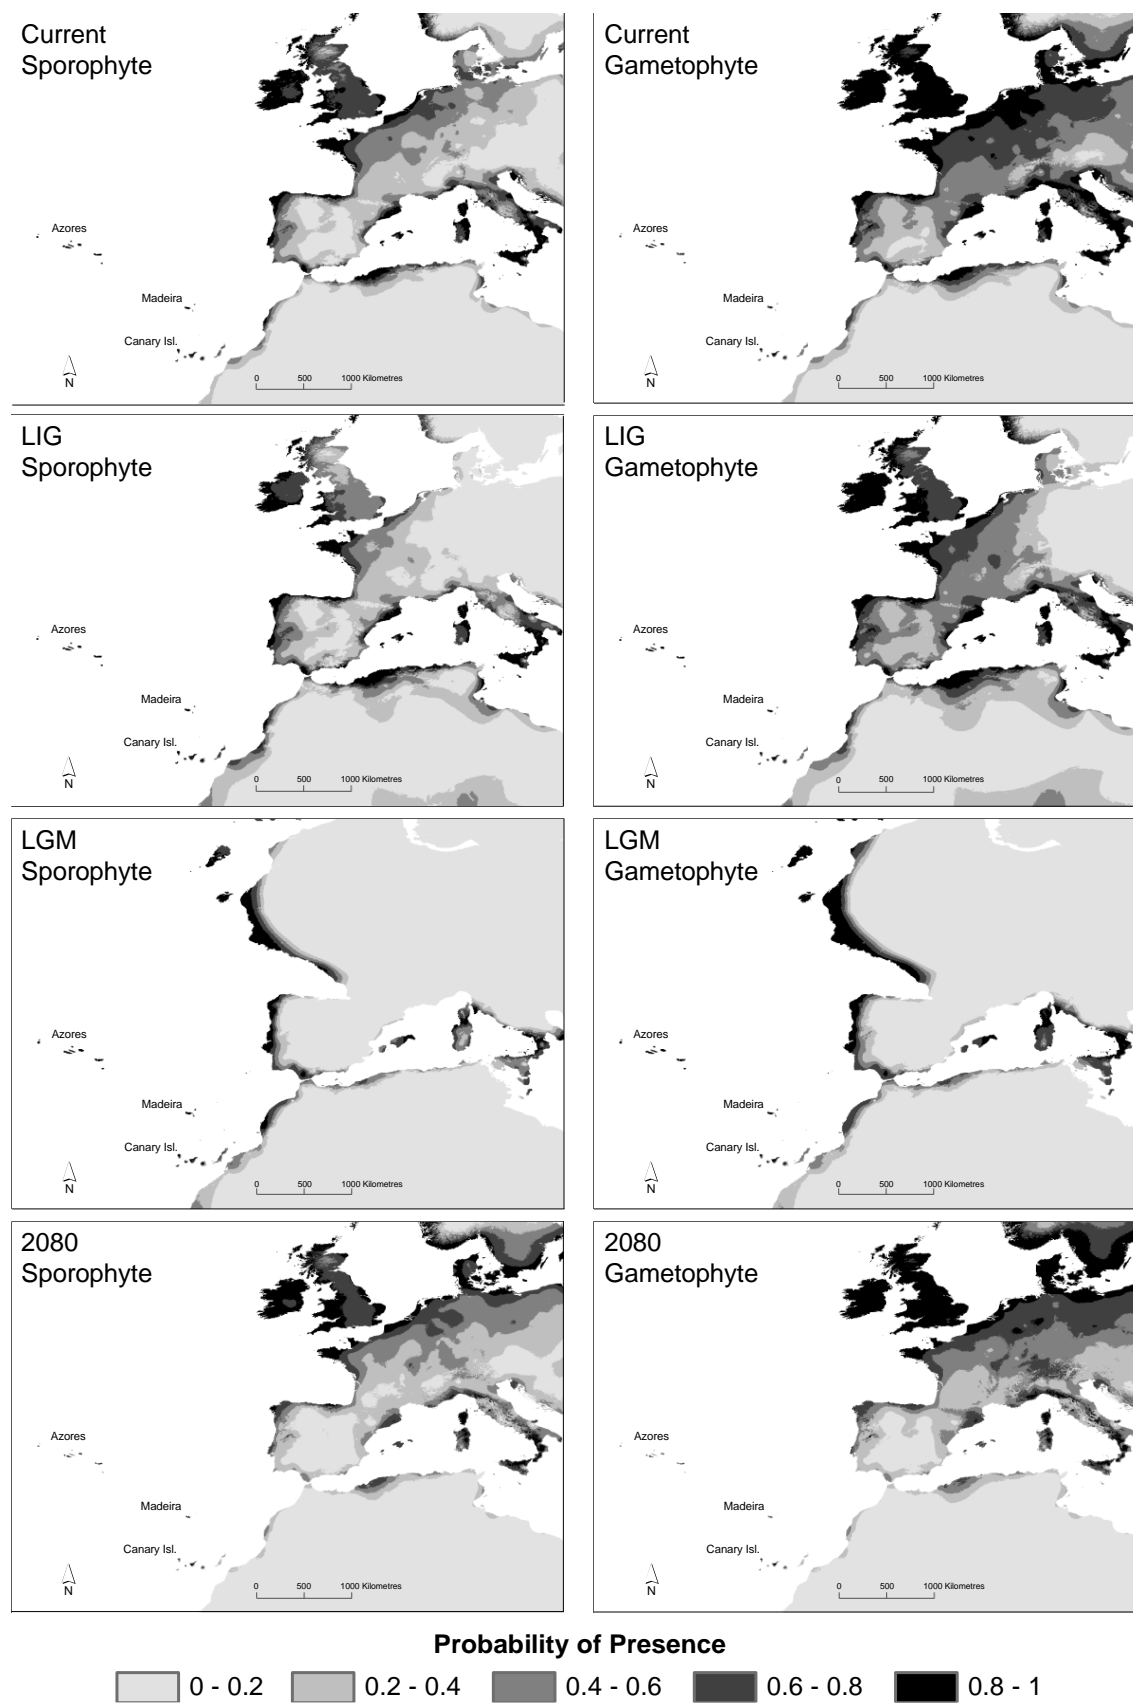

**Figure S4.** Results of species distribution modelling for the sporophyte and gametophyte phases of the life cycle of *Vandemboschia speciosa* using the maximum entropy algorithm and the Community Climate System Model (CCSM), as implemented in MaxEnt. Projections for current, last interglacial (LIG, c. 120-140 ka), last glacial maximum (LGM, c. 21 ka), and future (2080) conditions are shown.

**Table S1.** Sampling details of *Vandenboschia speciosa* populations and outgroup species.

| Code                                | Location                    | Voucher <sup>a</sup>                  | Geographical coordinates | Sample size<br><i>trnH-psbA</i> | Sample size<br><i>gapCp</i> <sup>b</sup> |
|-------------------------------------|-----------------------------|---------------------------------------|--------------------------|---------------------------------|------------------------------------------|
| Andalusia                           |                             |                                       |                          |                                 |                                          |
| ALM                                 | Almoraima                   |                                       | N36.304°/W5.520°         | G: 5                            | 5                                        |
| COQ                                 | Canuto de Ojén Quesada      | <i>GDA 61589</i>                      | N36.127°/W5.585°         | G:5/S:11                        | 5                                        |
| CRM                                 | Cabecera del río de la Miel | <i>GDA 62522</i>                      | N36.105°/W5.528°         | S:6                             |                                          |
| MCH                                 | Moracha                     | <i>GDA 62523</i>                      | N36.497°/W5.584°         | G:5/S:5                         | 5                                        |
| SCD                                 | Garganta de la Saucedá      | <i>GDA 62524</i>                      | N36.535°/W5.605°         | S:3                             |                                          |
| SDN                                 | Sierra del Niño             | <i>GDA 62525</i>                      | N36.186°/W5.610°         | S:4                             |                                          |
| VIF                                 | Valdeinfierno               | <i>GDA 62526</i>                      | N36.224°/W5.604°         | G:5/S:5                         | 5                                        |
| Azores                              |                             |                                       |                          |                                 |                                          |
| CAR                                 | Terceira: Algar do Carvão   |                                       | N38.727°/W27.215°        | G:5/S:5                         | 5                                        |
| CID                                 | São Miguel: Sete Cidades    |                                       | N37.835°/W25.788°        | G:5/S:5                         | 5                                        |
| CON                                 | São Miguel: Lagoa do Congro |                                       | N37.754°/W25.407°        | G:5/S:5                         | 5                                        |
| NAT                                 | Terceira: Gruta do Natal    |                                       | N38.738°/W27.264°        | G:5/S:5                         | 5                                        |
| Basque Country                      |                             |                                       |                          |                                 |                                          |
| AZK                                 | Azketa erreka               |                                       | N43.194°/W1.940°         | G:5/S:5                         | 4                                        |
| ERR                                 | Erramundi erreka            |                                       | N43.377°/W1.826°         | G:3/S:5                         | 3                                        |
| ITU                                 | Iturraingo erreka           |                                       | N43.373°/W1.833°         | G:5                             | 2                                        |
| USO                                 | Usoko erreka                |                                       | N43.242°/W1.908°         | G:5/S:11                        | 5                                        |
| Canary Isl.                         |                             |                                       |                          |                                 |                                          |
| ANC                                 | La Gomera: Ancón Negro      |                                       | N28.134°/W17.273°        | G:5/S:5                         | 5                                        |
| CED                                 | La Gomera: Bco. del Cedro   |                                       | N28.120°/W17.225°        | G:4/S:5                         | 4                                        |
| IJU                                 | Tenerife: Ijuana            |                                       | N28.560°/W16.172°        | G:5/S:5                         | 5                                        |
| PIJ                                 | Tenerife: El Pijaral        |                                       | N28.553°/W16.188°        | G:5/S:5                         | 5                                        |
| ZAR                                 | La Gomera: La Zarcita       |                                       | N28.119°/W17.224°        | G:5/S:5                         | 5                                        |
| Czech Republic                      |                             |                                       |                          |                                 |                                          |
| HAR                                 | Harasov                     |                                       | N50.410°/E14.567°        | G:6                             | 3                                        |
| MUZ                                 | Mužský                      |                                       | N50.528°/E15.054°        | G:5                             | 3                                        |
| SKA                                 | Skalka                      |                                       | N50.585°/E14.424°        | G:5                             | 3                                        |
| Galicia                             |                             |                                       |                          |                                 |                                          |
| EUM                                 | Eume                        |                                       | N43.404°/W8.087°         | G:5/S:1                         | 5                                        |
| SEI                                 | Seixo                       |                                       | N43.706°/W7.946°         | G:5/S:5                         | 5                                        |
| Ire-Wal-Bri*                        |                             |                                       |                          |                                 |                                          |
| COR                                 | Cork                        |                                       | N51.570°/W9.148°         | G:5/S:5                         | 5                                        |
| DEV                                 | Devil's Bridge              |                                       | N52.376°/W3.849°         | G:4                             | 3                                        |
| LIM                                 | Limerick                    |                                       | N52.663°/W8.387°         | G:5/S:4                         | 5                                        |
| TAU                                 | Taupont                     |                                       | N47.962°/W2.429°         | G:2/S:4                         | 2                                        |
| WAT                                 | Waterford                   |                                       | N52.115°/W7.585°         | G:5/S:5                         | 5                                        |
| Italy                               |                             |                                       |                          |                                 |                                          |
| SER                                 | Seravezza                   |                                       | N44.015°/E10.219°        | G:5/S:6                         | 5                                        |
| STA                                 | Stazzema                    |                                       | N43.991°/E10.315°        | G:5                             | 5                                        |
| Luxembourg                          |                             |                                       |                          |                                 |                                          |
| ARD                                 | Ardennes                    |                                       | N49.906°/E5.954°         | G:5                             | 3                                        |
| BEA                                 | Beaufort                    |                                       | N49.832°/E6.287°         | G:3                             | 3                                        |
| ROL                                 | Rollingen                   |                                       | N49.739°/E6.133°         | G:3                             | 3                                        |
| Madeira                             |                             |                                       |                          |                                 |                                          |
| FRI                                 | Ribeiro Frio                |                                       | N32.734°/W16.886°        | G:5/S:5                         | 5                                        |
| POR                                 | Levada Portadela            |                                       | N32.747°/W16.823°        | G:3/S:1                         | 3                                        |
| URZ                                 | Lombo do Urzal              |                                       | N32.776°/W16.977°        | S:5                             |                                          |
| Vosges du Nord                      |                             |                                       |                          |                                 |                                          |
| BIT                                 | Bitche                      |                                       | N49.024°/E7.620°         | G:5                             | 3                                        |
| PIE                                 | La Petite Pierre            |                                       | N48.848°/E7.301°         | G:5                             | 3                                        |
| <i>V. davallioides</i> <sup>c</sup> |                             | <i>UME 213054</i>                     |                          | S:1                             | 1                                        |
|                                     |                             | <i>UME 213055</i>                     |                          | -                               | 4                                        |
| <i>V. birmanica</i> <sup>c</sup>    |                             | <i>UPS V-153841</i>                   |                          | S:1                             | -                                        |
| <i>V. boschiana</i> <sup>c</sup>    |                             | Personal collection of Fred J. Rumsey | <i>Sample 1</i>          | S:1                             | S:5                                      |
|                                     |                             |                                       | <i>Sample 2</i>          | S:1                             | S:5                                      |

<sup>a</sup> Voucher available only for sporophytes; <sup>b</sup> *gapCp* only studied with gametophyte individuals except outgroups; <sup>c</sup> species analysed as outgroups. \*Ireland-Wales-Brittany. G, Gametophyte individuals; S, sporophyte individuals.

**Table S2.** Percentage contribution and permutation importance of selected model for the species distribution modelling (SDM).

| Variable                                 | Gametophyte                       |                                     | Sporophyte                        |                                     | Species as a whole                |                                     |
|------------------------------------------|-----------------------------------|-------------------------------------|-----------------------------------|-------------------------------------|-----------------------------------|-------------------------------------|
|                                          | MaxEnt<br>Percent<br>contribution | MaxEnt<br>Permutation<br>importance | MaxEnt<br>Percent<br>contribution | MaxEnt<br>Permutation<br>importance | MaxEnt<br>Percent<br>contribution | MaxEnt<br>Permutation<br>importance |
| <b>Min. temperature of coldest month</b> | 51.5                              | 75                                  | 46.5                              | 82.1                                | 51.5                              | 74.6                                |
| <b>Mean diurnal range</b>                | 40.8                              | 15                                  | 41.1                              | 10.9                                | 40.8                              | 13.9                                |
| Precipitation of warmest quarter         | 2.8                               | 0.2                                 | 6.4                               | 2.7                                 | 2.7                               | 0.3                                 |
| Precipitation seasonality                | 2.4                               | 0.6                                 | 4.4                               | 2.1                                 | 2.3                               | 0.7                                 |
| max. temperature of warmest month        | 2.2                               | 5.8                                 | 0.6                               | 0                                   | 2.3                               | 7.2                                 |
| Precipitation of coldest quarter         | 0.2                               | 1.5                                 | 0.4                               | 0                                   | 0.3                               | 1.3                                 |
| Precipitation of wettest month           | 0.1                               | 1.8                                 | 0.4                               | 1.8                                 | 0.1                               | 2                                   |
| Precipitation of driest month            | 0                                 | 0                                   | 0.1                               | 0.4                                 | 0                                 | 0                                   |

Variables in bold were selected for the final model.

**Table S3** Neutrality tests Fu's  $F$  and Tajima's  $D$  at the regional and supra-regional groupings.

| Code           | <i>trnH-psbA</i> |            |        |            | gapC-572 |                 |         |                 | gapC-575 |                 |         |                 |
|----------------|------------------|------------|--------|------------|----------|-----------------|---------|-----------------|----------|-----------------|---------|-----------------|
|                | $D$              | $P$ -value | $F$    | $P$ -value | $D$      | $P$ -value      | $F$     | $P$ -value      | $D$      | $P$ -value      | $F$     | $P$ -value      |
| Andalusia      | 1.634            | 0.945      | 3.412  | 0.911      | -1.732   | <b>0.02</b>     | -3.381  | <b>0.002</b>    | -2.104   | <b>0.005</b>    | -7.578  | <b>&lt;.001</b> |
| Azores         | -1.411           | 0.071      | -1.592 | 0.064      | -2.103   | <b>0.001</b>    | -6.956  | <b>&lt;.001</b> | -1.608   | 0.188           | -4.683  | N.A.            |
| Basque         | 0.35             | 0.688      | 0.462  | 0.64       | -2.006   | <b>0.003</b>    | -5.317  | <b>&lt;.001</b> | -1.7334  | <b>0.012</b>    | -3.147  | <b>0.002</b>    |
| Country        |                  |            |        |            |          |                 |         |                 |          |                 |         |                 |
| Canary Isl.    | -0.271           | 0.421      | 0.703  | 0.632      | -1.879   | <b>0.008</b>    | -5.036  | <b>0.001</b>    | -1.860   | <b>0.008</b>    | -7.928  | <b>&lt;.001</b> |
| Czech Republic | 0                | 1          | 0      | 1          | -1.491   | <b>0.07</b>     | -1.546  | <b>0.018</b>    | -2.121   | <b>0.002</b>    | -3.415  | <b>0.003</b>    |
| Galicia        | 0.735            | 0.802      | 1.279  | 0.789      | -1.731   | <b>0.015</b>    | -2.9556 | <b>&lt;.001</b> | -1.9556  | <b>0.004</b>    | -4.434  | <b>&lt;.001</b> |
| Ire-Wal-Bri*   | 1.503            | 0.922      | 1.139  | 0.760      | -1.881   | <b>0.006</b>    | -4.979  | <b>&lt;.001</b> | -2.349   | <b>&lt;.001</b> | -10.947 | <b>&lt;.001</b> |
| Italy          | 0                | 1          | 0      | N.A.       | -2.056   | <b>0.003</b>    | -5.655  | <b>&lt;.001</b> | -1.943   | <b>0.004</b>    | -3.698  | <b>0.001</b>    |
| Luxembourg     | 0                | 1          | 0      | N.A.       | -1.706   | <b>0.021</b>    | -2.527  | <b>0.004</b>    | 0        | 1               | -0.879  | 0.078           |
| Madeira        | 0.541            | 0.774      | 2.033  | 0.797      | -1.159   | 0.155           | -0.649  | 0.105           | 0        | 1               | 0       | N.A.            |
| Vosges du Nord | 0.019            | 0.658      | 1.523  | 0.727      | -1.562   | <b>0.021</b>    | -1.964  | <b>0.008</b>    | -1.697   | <b>0.029</b>    | -2.449  | <b>0.001</b>    |
| North          | -0.224           | 0.412      | -1.018 | 0.347      | -2.366   | <b>&lt;.001</b> | -340    | <b>&lt;.001</b> | -2.478   | <b>&lt;.001</b> | -340    | <b>&lt;.001</b> |
| Cantabrian     | 0.388            | 0.68       | 0.667  | 0.655      | -2.239   | <b>&lt;.001</b> | -11.044 | <b>&lt;.001</b> | -2.244   | <b>&lt;.001</b> | -10.426 | <b>&lt;.001</b> |
| South          | 0.447            | 0.713      | 1.768  | 0.802      | -2.392   | <b>&lt;.001</b> | -23.066 | <b>&lt;.001</b> | -2.399   | <b>&lt;.001</b> | -28.768 | <b>&lt;.001</b> |

The results for the regional level are shown above the dotted line, and those for the supra-regional level appear below the dotted line. \*Ireland-Wales-Brittany. North, Northern evolutionary unit; Cantabrian, Cantabrian Cornice; South, Southern evolutionary unit.

Statistically significant values are indicated in bold text. N.A., not applicable.
